# Supplementary material for: Global mean surface temperature and climate sensitivity of the early Eocene Climatic Optimum (EECO), Paleocene–Eocene Thermal Maximum (PETM), and latest Paleocene
Source: Copernicus journal article supplement (doi:10.5194/cp-16-1953-2020), 2020-10-26
Supplement: Supplementary file 2 [file cp-16-1953-2020-supplement.zip]

Archive with 8 entries (8 files):
- B.EO_4_C4xt31.cam2.climo.avg.nc
- B.EO_3_C4xt31.cam2.climo.avg.nc
- cp-2019-167-supplement.pdf
- ERAI_ANN_climo.nc
- Read Me Hollis 2019 DeepMIP Compilation.xlsx
- cp-16-1953-2020-supplement-title-page.pdf
- Inglis Data 190620.xlsx
- Hollis 2019 DeepMIP compilation.csv
