# Supplementary material for: Global mean surface temperature and climate sensitivity of the early Eocene Climatic Optimum (EECO), Paleocene–Eocene Thermal Maximum (PETM), and latest Paleocene
Source: Copernicus journal article supplement (doi:10.5194/cp-16-1953-2020), 2020-10-26
Supplement: Supplementary file 2 [file cp-16-1953-2020-supplement.zip › cp-16-1953-2020-supplement-title-page.pdf]

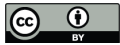

## *Supplement of*

# **Global mean surface temperature and climate sensitivity of the early Eocene Climatic Optimum (EECO), Paleocene–Eocene Thermal Maximum (PETM), and latest Paleocene**

**Gordon N. Inglis et al.**

*Correspondence to:* Gordon N. Inglis ([gordon.inglis@soton.ac.uk](mailto:gordon.inglis@soton.ac.uk))

- [cp-16-1953-2020-supplement-title-page.pdf](#)
- [B.EO\\_3\\_C4xt31.cam2.climo.avg.nc](#)
- [B.EO\\_4\\_C4xt31.cam2.climo.avg.nc](#)
- [ERA1\\_ANN\\_climo.nc](#)
- [Hollis 2019 DeepMIP compilation.csv](#)
- [Inglis Data 190620.xlsx](#)
- [Read Me Hollis 2019 DeepMIP Compilation.xlsx](#)
- [cp-2019-167-supplement.pdf](#)

The copyright of individual parts of the supplement might differ from the CC BY 4.0 License.
