# Supplementary material for: Global mean surface temperature and climate sensitivity of the early Eocene Climatic Optimum (EECO), Paleocene–Eocene Thermal Maximum (PETM), and latest Paleocene
Source: Copernicus journal article supplement (doi:10.5194/cp-16-1953-2020), 2020-10-26
Supplement: Supplementary file 2 [file cp-16-1953-2020-supplement.zip › Hollis 2019 DeepMIP compilation.csv]

site	timeslice	temperature	proxy	lat	lon	mlat	mlon	plat	plon	5	50	95	sd	mean minus reported error	mean plus reported error	deepmip lower error	deepmip upper error	min	max	v1	v2	v3	v4	v5
Lowana Road	eeco	lat	all	-42.15	145.3	-68.07	150.86	-58.35	160.58	-999.9	24.3	-999.9	-999.9	21	27.6	21	27.6	-999.9	-999.9	1	1	1	1	1
Cambalong Creek	lp	lat	ba	-36.8	149.1	-63.21	153.27	-53.26	163.81	-999.9	18.5	-999.9	-999.9	16.3	20.7	16.3	20.7	-999.9	-999.9	1	1	1	1	1
iodp 1356	eeco	lat	ba	-63.18	135.59	-66.35	129.16	-57.87	144.42	12.28	15.81	18.83	2.3	13.52	18.09	13.52	18.09	10.28	21.57	1	1	1	1	1
midwaipara	eeco	lat	ba	-43.07	172.74	-54.9	-160.07	-46.29	-161.06	-999.9	16.4	-999.9	-999.9	9.2	23.6	9.2	23.6	-999.9	-999.9	1	1	1	1	1
odp 913	eeco	lat	ba	75.49	-6.95	68.87	11.08	59.54	8.85	13.7	14.7	16.1	1	10.6	18.8	10.6	18.8	13.5	16.4	1	1	1	1	1
Otaio River	petm	lat	ba	-44.5	170.9	-58.19	-160.71	-48.7	-160.72	-999.9	16	-999.9	-999.9	16	16	16	16	-999.9	-999.9	1	1	1	1	1
Belkovsky Island	eeco	lat	ca	75.5	136	75.23	121.9	79.7	85.34	17.86	18.5	19.2	0.48	15.4	23.1	15.4	23.1	17.5	19.3	1	1	1	1	1
Faddeevsky Island	petm	lat	ca	76	141.8	75.82	124	79.42	83.56	18.06	18.8	20.52	1.1	16	22.1	16	22.1	-999.9	-999.9	1	1	1	1	1
iodp 1356	eeco	lat	ca	-63.18	135.59	-66.35	129.16	-57.87	144.42	17.45	18.41	20.9	0.99	17.42	19.39	17.42	19.39	17.2	21.95	1	1	1	1	1
Lowana Road	eeco	lat	ca	-42.15	145.3	-68.07	150.86	-58.35	160.58	-999.9	22.7	-999.9	-999.9	20.9	24.5	20.9	24.5	-999.9	-999.9	1	1	1	1	1
midwaipara	eeco	lat	ca	-43.07	172.74	-54.9	-160.07	-46.29	-161.06	-999.9	20	-999.9	-999.9	14.6	25.3	14.6	25.3	-999.9	-999.9	1	1	1	1	1
Otaio River	petm	lat	ca	-44.5	170.9	-58.19	-160.71	-48.7	-160.72	-999.9	17.4	-999.9	-999.9	17.4	17.4	17.4	17.4	-999.9	-999.9	1	1	1	1	1
Caleta Cocholgue	eeco	lat	cca	-36.58	-72.97	-37.24	-59.72	-43.77	-61	-999.9	19.3	-999.9	-999.9	17.2	21.4	17.2	21.4	-999.9	-999.9	1	1	1	1	1
Laguna del Hunco	eeco	lat	cca	-42.5	-70	-43.09	-56.48	-49.96	-58.96	-999.9	17.5	-999.9	-999.9	15.4	19.6	15.4	19.6	-999.9	-999.9	1	1	1	1	1
Rio Pichileufu	eeco	lat	cca	-42.17	-70	-42.76	-56.5	-49.63	-58.88	-999.9	18.3	-999.9	-999.9	16.2	20.4	16.2	20.4	-999.9	-999.9	1	1	1	1	1
Chu Chua BC	eeco	lat	clamp	49.52	-121.64	55.31	-108.02	54.81	-88.49	-999.9	7.3	-999.9	-999.9	5.3	9.3	5.3	9.3	-999.9	-999.9	1	1	1	1	1
Chuckanut	eeco	lat	clamp	48.7	-122.5	54.53	-109.1	54.26	-89.91	13.4	15.6	17.6	1.7	13.5	17.7	13.5	17.7	13	17.7	1	1	1	1	1
Gurha Mine	eeco	lat	clamp	27.9	72.9	4.38	64.46	2.28	69.09	-999.9	24.3	-999.9	-999.9	21.4	27.1	21.4	27.1	-999.9	-999.9	1	1	1	1	1
Otaio River	petm	lat	clamp	-44.5	170.9	-58.19	-160.71	-48.7	-160.72	-999.9	19.8	-999.9	-999.9	17.8	21.8	17.8	21.8	-999.9	-999.9	1	1	1	1	1
Princeton (One Mile Creek)	eeco	lat	clamp	49.5	-120.5	55.23	-106.73	54.52	-87.32	-999.9	7.3	-999.9	-999.9	5.3	9.3	5.3	9.3	-999.9	-999.9	1	1	1	1	1
Puget 9676 9677 WA	eeco	lat	clamp	47.49	-121.8	53.29	-108.45	52.96	-89.9	-999.9	16.2	-999.9	-999.9	14.2	18.2	14.2	18.2	-999.9	-999.9	1	1	1	1	1
Puget 9841 WA	eeco	lat	clamp	47.49	-121.8	53.29	-108.45	52.96	-89.9	-999.9	16.8	-999.9	-999.9	14.8	18.8	14.8	18.8	-999.9	-999.9	1	1	1	1	1
Republic	eeco	lat	clamp	48.6	-118.7	54.24	-104.82	53.25	-86.02	-999.9	9.4	-999.9	-999.9	7.4	11.4	7.4	11.4	-999.9	-999.9	1	1	1	1	1
Republic (Boot Hill)	eeco	lat	clamp	48.47	-118.52	54.11	-104.63	53.09	-85.91	-999.9	8.8	-999.9	-999.9	6.8	10.8	6.8	10.8	-999.9	-999.9	1	1	1	1	1
Republic (Knob Hill WA)	eeco	lat	clamp	48.47	-118.52	54.11	-104.63	53.09	-85.91	-999.9	11	-999.9	-999.9	9	13	9	13	-999.9	-999.9	1	1	1	1	1
alamedilla	lp	sst	del18O	37.58	-3.24	35.93	-3.75	25.58	1.57	19.49	20.47	21.34	0.68	-999.9	-999.9	19.49	21.34	18.96	22.14	0	1	0	0	0
alamedilla	petm	sst	del18O	37.58	-3.24	35.93	-3.75	25.58	1.57	19.67	20.21	20.99	0.56	-999.9	-999.9	19.67	20.99	19.58	21.07	0	1	0	0	0
bass river	lp	sst	del18O	39.61	-74.44	42.22	-58.2	35.19	-46.33	17.93	22.48	26.43	2.8	-999.9	-999.9	17.93	26.43	16.53	27.59	1	1	1	1	1
bass river	petm	sst	del18O	39.61	-74.44	42.22	-58.2	35.19	-46.33	24.43	27.6	31.47	2.58	-999.9	-999.9	24.43	31.47	23.79	33.85	1	1	1	1	1
Big Bend	eeco	lat	del18O	30	-103	34.69	-90.01	31.8	-78.54	-999.9	31.5	-999.9	-999.9	26	37	26	37	-999.9	-999.9	1	1	1	1	0
Bighorn Basin	eeco	lat	del18O	43.96	-107.65	48.94	-93.24	46.22	-77.49	-999.9	18.3	-999.9	-999.9	12.8	23.8	12.8	23.8	-999.9	-999.9	1	1	1	1	0
dsdp 277	eeco	sst	del18O	-52.22	166.19	-63.62	-170.33	-54.26	-170.93	14.54	16.7	18.05	2.17	-999.9	-999.9	14.54	18.05	14.17	18.07	0	1	0	0	0
dsdp 277	lp	sst	del18O	-52.22	166.19	-65.56	-168.97	-55.59	-168.37	13.19	14.84	16.76	1.73	-999.9	-999.9	13.19	16.76	12.94	17.13	0	1	0	0	0
dsdp 277	petm	sst	del18O	-52.22	166.19	-65.56	-168.97	-55.59	-168.37	18.22	20.02	22.64	2.04	-999.9	-999.9	18.22	22.64	18.14	22.73	0	1	0	0	0
dsdp 401	lp	sst	del18O	47.43	-8.81	46.29	-9.73	35.93	-3.7	14.95	17.09	20.23	1.82	-999.9	-999.9	14.95	20.23	14.77	20.99	1	1	1	1	1
dsdp 401	petm	sst	del18O	47.43	-8.81	46.29	-9.73	35.93	-3.7	18.26	21.6	23.93	1.89	-999.9	-999.9	18.26	23.93	18.19	24.06	1	1	1	1	1
dsdp 401	petm	sst	del18O	47.43	-8.81	46.29	-9.73	35.93	-3.7	18.26	21.6	23.93	1.89	-999.9	-999.9	18.26	23.93	18.19	24.06	1	1	1	1	1
dsdp 527	lp	sst	del18O	-24.04	1.76	-27.19	-8.98	-37.56	-3.42	14.79	15.58	16.54	0.8	-999.9	-999.9	14.79	16.54	12.68	16.9	0	1	0	0	0
dsdp 527	petm	sst	del18O	-24.04	1.76	-27.19	-8.98	-37.56	-3.42	18.52	19.22	20.26	0.66	-999.9	-999.9	18.52	20.26	18.5	20.74	0	1	0	0	0
dsdp 549	lp	sst	del18O	49.08	-13.98	47.9	-13.97	37.58	-7.27	20.53	21.79	23.42	1.67	-999.9	-999.9	20.53	23.42	20.44	23.66	0	1	0	0	0
dsdp 549	petm	sst	del18O	49.08	-13.98	47.9	-13.97	37.58	-7.27	20.16	22.36	25.89	1.98	-999.9	-999.9	20.16	25.89	19.77	26.79	0	1	0	0	0
dsdp 577	eeco	sst	del18O	32.26	157.43	21.21	-170.47	30.31	-163.3	15.98	17.81	19.35	0.99	-999.9	-999.9	15.98	19.35	15.1	19.85	0	1	0	0	0
dsdp 577	lp	sst	del18O	32.26	157.43	19.26	-168.72	29.03	-161.42	16.85	18.09	18.87	0.69	-999.9	-999.9	16.85	18.87	16.29	19.4	0	1	0	0	0
Ellesmere Island	eeco	lat	del18o	78.8	-82	78.89	-35.26	69.29	-20.05	-999.9	4	-999.9	-999.9	-1.5	9.5	-1.5	9.5	-999.9	-999.9	1	1	1	1	0
Green River Basin	eeco	lat	del18O	42.3	-108.5	47.34	-94.4	44.86	-79.12	-999.9	15.5	-999.9	-999.9	10	21	10	21	-999.9	-999.9	1	1	1	1	0
Green River Basin	eeco	lat	del18O	42.3	-108.5	47.34	-94.4	44.86	-79.12	-999.9	12	-999.9	-999.9	8.9	15.1	8.9	15.1	8	16	1	1	1	1	0
hampden beach	eeco	sst	del18O	-45.32	107.83	-57.05	-162.78	-48.22	-163.7	18.07	18.77	19.54	0.65	-999.9	-999.9	18.07	19.54	17.96	19.63	1	1	1	1	1
lodo gulch	eeco	sst	del18O	36.59	-120.64	42.36	-108.2	42.35	-93.88	17.46	19.06	20.24	1.16	-999.9	-999.9	17.46	20.24	17.03	20.39	1	1	1	1	1
lodo gulch	petm	sst	del18O	36.59	-120.64	43.24	-107.39	44.11	-91.76	19.42	21.49	23.04	0.79	-999.9	-999.9	19.42	23.04	19.24	23.6	1	1	1	1	1
midwaipara	eeco	sst	del18O	-43.06	172.61	-54.88	-160.24	-46.26	-161.19	23.51	28.36	33.48	4.18	-999.9	-999.9	23.51	33.48	23.3	34.64	1	1	1	1	1
millville	lp	sst	del18O	39.24	-75.05	41.8	-58.29	34.79	-46.51	20.63	23.4	25.82	2.13	-999.9	-999.9	20.63	25.82	20.44	27.02	1	1	1	1	1
millville	petm	sst	del18O	39.24	-75.05	41.8	-58.29	34.79	-46.51	25.29	28.06	31.68	2.13	-999.9	-999.9	25.29	31.68	24.75	35.35	1	1	1	1	1
odp 1209	lp	sst	del18O	32.68	158.6	19.59	-167.63	29.29	-160.23	17.41	18.73	20.25	1.05	-999.9	-999.9	17.41	20.25	15.36	20.88	0	1	0	0	0
odp 1209	petm	sst	del18O	32.68	158.6	19.59	-167.63	29.29	-160.23	18.06	20.25	22.04	1.22	-999.9	-999.9	18.06	22.04	16.98	22.92	0	1	0	0	0
odp 401	eeco	sst	del18O	47.43	-8.81	46.22	-9.37	36.28	-4.79	15.69	16.97	18.51	0.97	-999.9	-999.9	15.69	18.51	15.61	18.8	0	1	0	0	0
odp 689	lp	sst	del18O	-64.31	3.06	-60.59	-4.35	-70.94	3.04	10.79	12.71	15.71	2.48	-999.9	-999.9	10.79	15.71	10.76	15.92	0	1	0	0	0
odp 689	petm	sst	del18O	-64.31	3.06	-60.59	-4.35	-70.94	3.04	15.73	15.98	16.23	0.39	-999.9	-999.9	15.73	16.23	15.7	16.26	0	1	0	0	0
odp 690	eeco	sst	del18O	-65.33	1.28	-62.3	-5.76	-72.13	3.57	6.96	12.87	17.03	3.45	-999.9	-999.9	6.96	17.03	5.28	18.45	0	1	0	0	0
odp 690	lp	sst	del18O	-65.33	1.28	-61.35	-6.04	-71.72	0.54	8.82	11.11	15.5	1.77	-999.9	-999.9	8.82	15.5	7.44	16.01	0	1	0	0	0
odp 690	petm	sst	del18O	-65.33	1.28	-61.35	-6.04	-71.72	0.54	14.12	17.45	21.43	2.52	-999.9	-999.9	14.12	21.43	13.49	21.9	0	1	0	0	0
odp 738	eeco	sst	del18O	-62.72	82.79	-63.63	72.33	-62.59	97.24	10.48	12.29	14.02	1.68	-999.9	-999.9	10.48	14.02	6.16	14.58	0	1	0	0	0
odp 865	eeco	sst	del18O	18.44	-179.56	6.53	-149.88	13.66	-143.44	16.82	20.04	22.24	1.73	-999.9	-999.9	16.82	22.24	16.56	22.77	0	1	0	0	0
odp 865	lp	sst	del18O	18.55	-179.65	4.66	-148.24	12.62	-141.5	17.9	20.25	21.56	1.32	-999.9	-999.9	17.9	21.56	13.94	22.87	0	1	0	0	0
odp 865	petm	sst	del18O	18.55	-179.65	4.66	-148.24	12.62	-141.5	17.7	20.45	22.59	1.46	-999.9	-999.9	17.7	22.59	16.24	23.9	0	1	0	0	0
odp 865 sim	petm	sst	del18O	18.55	-179.65	4.66	-148.24	12.62	-141.5	23.69	30.82	32.76	2.37	-999.9	-999.9	23.69	32.76	22.77	32.86	0	1	0	0	0
odp 865 sims	eeco	sst	del18O	18.44	-179.56	6.53	-149.88	13.66	-143.44	22.96	25.91	27.97	1.94	-999.9	-999.9	22.96	27.97	22.77	28.41	0	1	0	0	0
odp 865 sims	lp	sst	del18O	18.55	-179.65	4.66	-148.24	12.62	-141.5	27.59	29.51	30.89	1.32	-999.9	-999.9	27.59	30.89	27.35	30.93	0	1	0	0	0
Powder River Basin	eeco	lat	del18O	44.5	-107	49.43	-92.44	46.56	-76.59	-999.9	18.7	-999.9	-999.9	13.2	24.2	13.2	24.2	-999.9	-999.9	1	1	1	1	0
sagamu nigeria	lp	sst	del18O	6.8	3.63	2.99	-2.16	-7.33	3.59	28.15	29.14	30.12	1.55	-999.9	-999.9	28.15	30.12	28.04	30.23	1	1	1	1	1
San Juan Basin	eeco	lat	del18O	36.5	-107.5	41.5	-94.06	39.12	-80.61	-999.9	27.8	-999.9	-999.9	22.3	33.3	22.3	33.3	-999.9	-999.9	1	1	1	1	0
tanzania	eeco	sst	del18O	-8.85	39.63	-16.77	32.65	-23.49	40.56	28.27	29.63	30.96	1.52	-999.9	-999.9	28.27	30.96	28.25	30.98	1	1	1	1	1
tdp 14	lp	sst	del18O	-9.28	39.51	-17.27	31.85	-25.13	40.21	25.69	28.99	32.1	2.11	-999.9	-999.9	25.69	32.1	24.25	33.13	1	1	1	1	1
tdp 14	petm	sst	del18O	-9.28	39.51	-17.27	31.85	-25.13	40.21	27.16	32.4	38.44	4.81	-999.9	-999.9	27.16	38.44	27.15	38.58	1	1	1	1	1
tumey	petm	sst	del18O	36.32	-120.38	42.96	-107.12	43.79	-91.6	22.41	23.13	23.83	0.64	-999.9	-999.9	22.41	23.83	22.38	23.9	1	1	1	1	1
wilson lake	eeco	sst	del18O	39.66	-75.04	41.69	-59.59	34.41	-49.03	-999.9	23.57	-999.9	-999.9	-999.9	-999.9	-999.9	-999.9	-999.9	-999.9	1	1	1	1	1
wilson lake	lp	sst	del18O	39.66	-75.04	42.23	-58.01	35.17	-46.16	-999.9	18.78	-999.9	-999.9	-999.9	-999.9	-999.9	-999.9	-999.9	-999.9	1	1	1	1	1
wilson lake	petm	sst	del18O	39.66	-75.04	42.23	-58.01	35.17	-46.16	26.33	28.51	30.64	1.49	-999.9	-999.9	26.33	30.64	26	31.67	1	1	1	1	1
ampe quarry	eeco	sst	del47	51.01	3.23	49.58	2.7	39.95	5.32	28.63	29.8	30.97	1.83	27.3	32.4	27.3	32.4	28.5	31.1	1	1	1	1	1
Bighorn Basin	eeco	lat	del47	44.77	-107.13	48.94	-93.24	46.22	-77.49	-999.9	43.2	-999.9	-999.9	37.6	48.8	37.6	48.8	-999.9	-999.9	1	1	1	1	1
Bighorn Basin	lp	lat	del47	44	-107.7	48.88	-93.23	47.04	-76.14	-999.9	31.3	-999.9	-999.9	26.1	36.5	26.1	36.5	-999.9	-999.9	1	1	1	1	1
Bighorn Basin	petm	lat	del47	44	-107.7	48.88	-93.23	47.04	-76.14	-999.9	38.2	-999.9	-999.9	34.2	42.2	34.2	42.2	-999.9	-999.9	1	1	1	1	1
Green River Basin	eeco	lat	del47	42.24	-108.53	47.34	-94.4	44.86	-79.12	-999.9	27.1	-999.9	-999.9	23.8	30.4	23.8	30.4	-999.9	-999.9	1	1	1	1	1
gsb kester borehole	eeco	sst	del47	50.76	4.12	49.58	2.7	39.95	5.32	-999.9	20	-999.9	-999.9	17.6	22.5	17.6	22.5	-999.9	-999.9	1	1	1	1	1
hatchetigbee	eeco	sst	del47	31.5	-92.1	34.86	-74.27	29.54	-63.73	26.38	27.1	27.73	1.06	24.8	29.5	24.8	29.5	27.8	26.3	1	1	1	1	1
kutch	eeco	sst	del47	23.53	68.62	1.41	60.96	-1.24	66.14	-999.9	35.1	-999.9	-999.9	32.6	37.7	32.6	37.7	-999.9	-999.9	1	1	1	1	1
paris basin	eeco	sst	del47	49.4	3.5	47.37	1.38	37.69	4.36	-999.9	18.5	-999.9	-999.9	15.8	21.3	15.8	21.3	-999.9	-999.9	1	1	1	1	1
Tornilla Basin	eeco	lat	del47	29.44	-103.18	34.15	-90.26	31.31	-78.9	-999.9	27.4	-999.9	-999.9	22.9	31.9	22.9	31.9	-999.9	-999.9	1	1	1	1	1
Tornilla Basin	lp	lat	del47	29.4	-103.2	34.97	-89.27	32.83	-76.71	-999.9	26.8	-999.9	-999.9	21.6	32	21.6	32	-999.9	-999.9	1	1	1	1	1
Bighorn Basin (Hubble Bubble)	petm	lat	dlf	43.9	-107.6	49.77	-92.14	47.71	-74.78	-999.9	20.3	-999.9	-999.9	16.3	24.3	16.3	24.3	-999.9	-999.9	1	1	1	1	1
Bighorn Basin (Hubble Bubble)	petm	lat	dlf	43.9	-107.6	49.77	-92.14	47.71	-74.78	-999.9	20.2	-999.9	-999.9	16.9	23.5	16.9	23.5	-999.9	-999.9	1	1	1	1	1
Republic	eeco	lat	dlf	48.6	-118.7	54.24	-104.82	53.25	-86.02	-999.9	9	-999.9	-999.9	5	13	5	13	-999.9	-999.9	1	1	1	1	1
Republic	eeco	lat	dlf	48.6	-118.7	54.24	-104.82	53.25	-86.02	-999.9	8.9	-999.9	-999.9	5.6	12.2	5.6	12.2	-999.9	-999.9	1	1	1	1	1
Laguna del Hunco	eeco	lat	dlp	-42.5	-70	-43.09	-56.48	-49.96	-58.96	-999.9	10.9	-999.9	-999.9	6.9	14.9	6.9	14.9	-999.9	-999.9	1	1	1	1	1
Laguna del Hunco	eeco	lat	dlp	-42.5	-70	-43.09	-56.48	-49.96	-58.96	-999.9	16.9	-999.9	-999.9	15.2	18.6	15.2	18.6	-999.9	-999.9	1	1	1	1	1
Barsingsar Kasnau Matasukh	lp	lat	gdgtlignite	27.8	73.2	-0.4	62.64	-3.87	68.72	28.07	28.44	28.87	0.45	28.07	28.81	28.07	28.81	28.03	28.92	1	1	1	1	1
Cobham lignite	lp	lat	gdgtlignite	51.4	0.4	50.38	-1.64	40.06	3.08	23.68	24.62	25.68	0.8	23.89	25.36	23.89	25.36	23.67	25.85	1	1	1	1	1
Khadsaliya Clays	eeco	lat	gdgtlignite	21.65	72.2	-1.28	61.73	-3.76	67.35	28.16	28.46	28.69	0.3	28.21	28.7	28.21	28.7	28.12	28.71	1	1	1	1	1
Otaio River	eeco	lat	gdgtlignite	-44.5	170.9	-56.24	-162.58	-47.43	-163.38	27.24	27.87	28.85	0.72	27.21	28.52	27.21	28.52	27.22	28.93	1	1	1	1	1
Sch�ningen lignite	eeco	lat	gdgtlignite	51.1	11	50.09	9.92	40.81	11.36	26.12	27.29	28.05	0.66	26.64	27.94	26.64	27.94	25.18	28.13	1	1	1	1	1
Bighorn Basin (Cabin Fork)	petm	lat	lma	44	-107.6	49.77	-92.14	47.71	-74.78	-999.9	19.8	-999.9	-999.9	16.7	22.9	16.7	22.9	-999.9	-999.9	1	1	1	1	1
Bighorn Basin (Hubble Bubble)	petm	lat	lma	43.9	-107.6	49.77	-92.14	47.71	-74.78	-999.9	21.1	-999.9	-999.9	17.8	24.4	17.8	24.4	-999.9	-999.9	1	1	1	1	1
Bighorn Basin (Hubble Bubble)	petm	lat	lma	43.9	-107.6	49.77	-92.14	47.71	-74.78	-999.9	19.2	-999.9	-999.9	16.5	21.8	16.5	21.8	-999.9	-999.9	1	1	1	1	1
Bighorn Basin (Hubble Bubble)	petm	lat	lma	43.9	-107.6	49.77	-92.14	47.71	-74.78	-999.9	25.9	-999.9	-999.9	21.9	29.9	21.9	29.9	-999.9	-999.9	1	1	1	1	1
Bighorn Basin (Hubble Bubble)	petm	lat	lma	43.9	-107.6	49.77	-92.14	47.71	-74.78	-999.9	17.9	-999.9	-999.9	15.7	20.1	15.7	20.1	-999.9	-999.9	1	1	1	1	1
Bighorn Basin (Polecat Bench)	eeco	lat	lma	43.96	-107.65	48.94	-93.24	46.22	-77.49	-999.9	21.7	-999.9	-999.9	15.4	30.8	15.4	30.8	-999.9	-999.9	1	1	1	1	1
Cambalong Creek	lp	lat	lma	-36.8	149.1	-63.21	153.27	-53.26	163.81	-999.9	13.5	-999.9	-999.9	10.6	16.4	10.6	16.4	-999.9	-999.9	1	1	1	1	1
Chuckanut	eeco	lat	lma	48.7	-122.5	54.53	-109.1	54.26	-89.91	14	19.13	23	3.8	16.3	22	16.3	22	13.4	23.4	1	1	1	1	1
Chuckanut	eeco	lat	lma	48.7	-122.5	54.53	-109.1	54.26	-89.91	13.5	17.6	20.7	3	15.3	19.9	15.3	19.9	13	21	1	1	1	1	1
Chuckanut	eeco	lat	lma	48.7	-122.5	54.53	-109.1	54.26	-89.91	17.4	23.57	28.2	4.6	20.2	27	20.2	27	16.7	28.6	1	1	1	1	1
Chuckanut	eeco	lat	lma	48.7	-122.5	54.53	-109.1	54.26	-89.91	13.1	16.59	19.2	2.5	14.5	18.6	14.5	18.6	12.8	19.4	1	1	1	1	1
Driftwood Canyon	eeco	lat	lma	54.8	-127	60.8	-113.54	60.95	-90.32	-999.9	8.3	-999.9	-999.9	4.7	11.9	4.7	11.9	-999.9	-999.9	1	1	1	1	1
Falkland	eeco	lat	lma	50.5	-119.6	56.19	-105.57	55.23	-85.73	-999.9	8.9	-999.9	-999.9	5.3	12.5	5.3	12.5	-999.9	-999.9	1	1	1	1	1
Laguna del Hunco	eeco	lat	lma	-42.5	-70	-43.09	-56.48	-49.96	-58.96	-999.9	20.7	-999.9	-999.9	14.1	26.5	14.1	26.5	-999.9	-999.9	1	1	1	1	1
Laguna del Hunco	eeco	lat	lma	-42.5	-70	-43.09	-56.48	-49.96	-58.96	-999.9	14.1	-999.9	-999.9	9.3	18.9	9.3	18.9	-999.9	-999.9	1	1	1	1	1
McAbee	eeco	lat	lma	51	-121	56.75	-107.09	56.03	-86.85	-999.9	12.8	-999.9	-999.9	9.2	16.4	9.2	16.4	-999.9	-999.9	1	1	1	1	1
Princeton (One Mile Creek)	eeco	lat	lma	49.5	-120.5	55.23	-106.73	54.52	-87.32	-999.9	5	-999.9	-999.9	1.4	8.6	1.4	8.6	-999.9	-999.9	1	1	1	1	1
Quilchena	eeco	lat	lma	50.13	-120.51	55.86	-106.65	55.11	-86.92	-999.9	19	-999.9	-999.9	15.4	22.6	15.4	22.6	-999.9	-999.9	1	1	1	1	1
Republic	eeco	lat	lma	48.6	-118.7	54.24	-104.82	53.25	-86.02	-999.9	11.3	-999.9	-999.9	7.7	14.9	7.7	14.9	-999.9	-999.9	1	1	1	1	1
Republic	eeco	lat	lma	48.6	-118.7	54.24	-104.82	53.25	-86.02	-999.9	9.2	-999.9	-999.9	4.4	14	4.4	14	-999.9	-999.9	1	1	1	1	1
Camanche Bridge	eeco	lat	mbtcbt	38.26	-120.89	44.04	-108.34	44.01	-93.47	-999.9	23.7	-999.9	-999.9	-999.9	-999.9	-999.9	-999.9	-999.9	-999.9	1	1	1	0	1
Chalk Bluffs	eeco	lat	mbtcbt	39.1	-120.83	44.87	-108.21	44.8	-93.06	-999.9	20.1	-999.9	-999.9	-999.9	-999.9	-999.9	-999.9	-999.9	-999.9	1	1	1	0	1
Cherokee Site 1	eeco	lat	mbtcbt	39.64	-121.54	45.44	-108.94	45.47	-93.57	-999.9	17.1	-999.9	-999.9	-999.9	-999.9	-999.9	-999.9	-999.9	-999.9	1	1	1	0	1
China Gulch	eeco	lat	mbtcbt	38.26	-120.89	44.04	-108.34	44.01	-93.47	-999.9	24.5	-999.9	-999.9	-999.9	-999.9	-999.9	-999.9	-999.9	-999.9	1	1	1	0	1
Council Hill	eeco	lat	mbtcbt	39.59	-120.99	45.37	-108.34	45.3	-93.01	-999.9	14.8	-999.9	-999.9	-999.9	-999.9	-999.9	-999.9	-999.9	-999.9	1	1	1	0	1
Fiona Hill	eeco	lat	mbtcbt	39.1	-120.85	44.88	-108.23	44.8	-93.08	-999.9	12.5	-999.9	-999.9	-999.9	-999.9	-999.9	-999.9	-999.9	-999.9	1	1	1	0	1
fur	lp	lat	mbtcbt	56.84	8.99	55.99	7.27	45.89	10.01	16.18	17.6	18.88	1.51	16.37	18.83	16.37	18.83	16	19	1	1	1	0	1
fur	petm	lat	mbtcbt	56.8	9	55.99	7.27	45.9	10.01	18.45	20.98	23.4	2.07	19.09	20.7	19.09	20.7	17.9	23.5	1	1	1	0	1
Gold Bug	eeco	lat	mbtcbt	39.37	-120.92	45.15	-108.28	45.08	-93.04	-999.9	17.3	-999.9	-999.9	-999.9	-999.9	-999.9	-999.9	-999.9	-999.9	1	1	1	0	1
Gulf Coastal Plain USA	eeco	lat	mbtcbt	31.66	-88.1	35.07	-74.29	29.76	-63.71	-999.9	21.3	-999.9	-999.9	16.3	26.3	16.3	26.3	-999.9	-999.9	1	1	1	0	1
harrell	lp	lat	mbtcbt	32.3	-88.7	35.76	-73.14	30.94	-61.35	20.75	21.36	22.08	0.51	20.87	21.85	20.87	21.85	20.57	22.29	1	1	1	0	1
harrell	petm	lat	mbtcbt	32.3	-88.7	35.76	-73.14	30.94	-61.35	25.31	26.61	27.69	0.86	25.78	27.43	25.78	27.43	25.26	27.89	1	1	1	0	1
Hidden Gold Camp	eeco	lat	mbtcbt	39.16	-120.86	44.94	-108.23	44.86	-93.06	-999.9	11.1	-999.9	-999.9	-999.9	-999.9	-999.9	-999.9	-999.9	-999.9	1	1	1	0	1
iodp 1356	eeco	lat	mbtcbt	-63.18	-999.9	-66.35	129.16	-57.87	144.42	16.73	20.11	21.25	1.47	18.65	21.58	18.65	21.58	16.03	21.48	1	1	1	0	1
iodp 302	lp	lat	mbtcbt	87.87	136.18	82.81	66.91	75.91	27.79	14.81	15.36	15.8	0.38	15	15.72	15	15.72	14.67	15.88	1	1	1	0	1
iodp 302	petm	lat	mbtcbt	87.5	136.1	82.74	69.64	76.11	28.98	18.71	19.93	20.92	0.8	19.16	20.7	19.16	20.7	18.03	20.98	1	1	1	0	1
Iowa Hill	eeco	lat	mbtcbt	39.11	-120.85	44.89	-108.23	44.81	-93.07	-999.9	19.1	-999.9	-999.9	-999.9	-999.9	-999.9	-999.9	-999.9	-999.9	1	1	1	0	1
midwaipara	eeco	lat	mbtcbt	-43.07	172.74	-54.9	-160.07	-46.29	-161.06	19.3	20.79	21.5	1	19.87	21.71	19.87	21.71	18.91	21.5	1	1	1	0	1
midwaipara	petm	lat	mbtcbt	-43.1	172.7	-56.84	-158.08	-47.54	-158.36	19.84	21.16	22.49	2.09	19.69	22.64	19.69	22.64	19.69	22.64	1	1	1	0	1
Mountain Boy	eeco	lat	mbtcbt	39.66	-120.95	45.43	-108.29	45.35	-92.94	-999.9	7.8	-999.9	-999.9	-999.9	-999.9	-999.9	-999.9	-999.9	-999.9	1	1	1	0	1
odp 1172	eeco	lat	mbtcbt	-43.57	149.55	-68.31	160.06	-58.38	167.11	21.39	21.95	22.55	0.42	21.55	22.35	21.55	22.35	21.23	22.72	1	1	1	0	1
Pentz	eeco	lat	mbtcbt	39.65	-121.56	45.46	-108.96	45.49	-93.59	-999.9	22.6	-999.9	-999.9	-999.9	-999.9	-999.9	-999.9	-999.9	-999.9	1	1	1	0	1
Pine Grove 1	eeco	lat	mbtcbt	39.72	-120.9	45.5	-108.22	45.4	-92.86	-999.9	14.9	-999.9	-999.9	-999.9	-999.9	-999.9	-999.9	-999.9	-999.9	1	1	1	0	1
Scotts Flat	eeco	lat	mbtcbt	39.27	-120.91	45.05	-108.28	44.98	-93.07	-999.9	15.1	-999.9	-999.9	-999.9	-999.9	-999.9	-999.9	-999.9	-999.9	1	1	1	0	1
store baelt	lp	lat	mbtcbt	52.35	11.8	51.55	10.28	41.6	12.9	17.89	18.72	19.65	0.73	18.04	19.39	18.04	19.39	17.81	19.8	1	1	1	0	1
store baelt	petm	lat	mbtcbt	55.3	11.1	54.52	9.41	44.52	17.79	17.79	19.03	20.33	1.09	18.01	20.05	18.01	20.05	17.73	20.45	1	1	1	0	1
Woolsey Flat	eeco	lat	mbtcbt	39.42	-120.86	45.19	-108.21	45.1	-92.95	-999.9	13.5	-999.9	-999.9	-999.9	-999.9	-999.9	-999.9	-999.9	-999.9	1	1	1	0	1
You Bet 2	eeco	lat	mbtcbt	39.21	-120.88	44.99	-108.25	44.92	-93.06	-999.9	15.1	-999.9	-999.9	-999.9	-999.9	-999.9	-999.9	-999.9	-999.9	1	1	1	0	1
bass river	lp	sst	mgca	39.61	-74.44	42.22	-58.2	35.19	-46.33	21.08	24.05	27.28	1.58	-999.9	-999.9	21.08	27.28	19.47	29.89	1	1	1	1	1
bass river	petm	sst	mgca	39.61	-74.44	42.22	-58.2	35.19	-46.33	21.68	26.8	32.03	1.95	-999.9	-999.9	21.68	32.03	19.19	37	1	1	1	1	1
dsdp 277	eeco	sst	mgca	-52.22	166.19	-63.62	-170.33	-54.26	-170.93	25.56	30.07	34.17	3.1	-999.9	-999.9	25.56	34.17	21.55	39.52	1	1	1	1	1
dsdp 277	lp	sst	mgca	-52.22	166.19	-65.56	-168.97	-55.59	-168.37	26.2	29.76	33.16	1.39	-999.9	-999.9	26.2	33.16	24.51	35.12	1	1	1	1	1
dsdp 277	petm	sst	mgca	-52.22	166.19	-65.56	-168.97	-55.59	-168.37	25.57	31.15	36.62	1.63	-999.9	-999.9	25.57	36.62	23.99	40.61	1	1	1	1	1
dsdp 401	lp	sst	mgca	47.43	-8.81	46.29	-9.73	35.93	-3.7	24.91	28.31	29.04	0.36	-999.9	-999.9	24.91	29.04	24.24	31.59	1	1	1	1	1
dsdp 401	petm	sst	mgca	47.43	-8.81	46.29	-9.73	35.93	-3.7	22.9	28.17	31.56	0.5	-999.9	-999.9	22.9	31.56	21.99	33.49	1	1	1	1	1
dsdp 527	lp	sst	mgca	-24.04	1.76	-27.19	-8.98	-37.56	-3.42	24.98	28.36	31.63	0.65	-999.9	-999.9	24.98	31.63	24.03	33.23	1	1	1	1	1
dsdp 527	petm	sst	mgca	-24.04	1.76	-27.19	-8.98	-37.56	-3.42	23.59	29.01	34.25	1.03	-999.9	-999.9	23.59	34.25	22.32	36.4	1	1	1	1	1
hampden beach	eeco	sst	mgca	-45.32	170.83	-57.05	-162.78	-48.22	-163.7	23.79	27.84	31.48	2.5	-999.9	-999.9	23.79	31.48	19.82	34.36	1	1	1	1	1
midwaipara	eeco	sst	mgca	-43.06	172.61	-54.88	-160.24	-46.26	-161.19	23.06	27.1	30.63	3.1	-999.9	-999.9	23.06	30.63	18.35	34.11	1	1	1	1	1
odp 1209	lp	sst	mgca	32.68	158.6	19.59	-167.63	29.29	-160.23	25.25	28.71	31.96	0.9	-999.9	-999.9	25.25	31.96	23.57	34.55	1	1	1	1	1
odp 1209	petm	sst	mgca	32.68	158.6	19.59	-167.63	29.29	-160.23	26.88	32.71	38.27	1.13	-999.9	-999.9	26.88	38.27	24.08	40.47	1	1	1	1	1
odp 865	eeco	sst	mgca	18.44	-179.56	6.53	-149.88	13.66	-143.44	29.31	35.05	39.09	1.46	-999.9	-999.9	29.31	39.09	27.83	41.57	1	1	1	1	1
odp 865	lp	sst	mgca	18.55	-179.65	4.66	-148.24	12.62	-141.5	27.07	30.88	34.31	1.02	-999.9	-999.9	27.07	34.31	24.97	36.81	1	1	1	1	1
odp 865	petm	sst	mgca	18.55	-179.65	4.66	-148.24	12.62	-141.5	25.63	31.12	36.59	0.84	-999.9	-999.9	25.63	36.59	24.33	38.35	1	1	1	1	1
saguma nigeria	lp	sst	mgca	6.8	3.63	2.99	-2.16	-7.33	3.59	28.38	32.48	36.04	1.81	-999.9	-999.9	28.38	36.04	24.89	39.43	1	1	1	1	1
tawanui	eeco	sst	mgca	-40.38	176.38	-53.9	-159.2	-45.8	-160.2	22.66	26.39	29.99	1.2	-999.9	-999.9	22.66	29.99	21.82	30.96	1	1	1	1	1
tora	eeco	sst	mgca	-41.52	175.48	-54.1	-159	-46	-160	24.17	28.37	32.02	3.2	-999.9	-999.9	24.17	32.02	19.14	37.74	1	1	1	1	1
Caleta Cocholgue	eeco	lat	mlr	-36.58	-72.97	-37.24	-59.72	-43.77	-61	-999.9	25.5	-999.9	-999.9	23.4	27.6	23.4	27.6	-999.9	-999.9	1	1	1	1	1
Laguna del Hunco	eeco	lat	mlr	-42.5	-70	-43.09	-56.48	-49.96	-58.96	-999.9	19.6	-999.9	-999.9	17.5	21.7	17.5	21.7	-999.9	-999.9	1	1	1	1	1
Rio Pichileufu	eeco	lat	mlr	-42.17	-70	-42.76	-56.5	-49.63	-58.88	-999.9	20.9	-999.9	-999.9	18.8	23	18.8	23	-999.9	-999.9	1	1	1	1	1
Lowana Road	eeco	lat	pls	-42.15	145.3	-68.07	150.86	-58.35	160.58	-999.9	23	-999.9	-999.9	19.7	26.3	19.7	26.3	-999.9	-999.9	1	1	1	1	1
Salta Basin NW Argentina	eeco	lat	pwi	-25	-70	-25.6	-57.12	-32.61	-55.89	10.2	11	12.6	1.1	9	13	9	13	10.1	12.8	1	1	1	1	0
Salta Basin NW Argentina	eeco	lat	sal	-25	-70	-25.6	-57.12	-32.61	-55.89	7.3	9.5	12.1	2.15	5.5	13.5	5.5	13.5	7.2	12.3	1	1	1	1	0
Wind River Basin	eeco	lat	sal	43	-108.5	48.04	-94.3	45.52	-78.79	-999.9	8.9	-999.9	-999.9	4.9	12.9	4.9	12.9	-999.9	-999.9	1	1	1	1	0
Caleta Cocholgue	eeco	lat	slr	-36.58	-72.97	-37.24	-59.72	-43.77	-61	-999.9	22.8	-999.9	-999.9	20.7	24.9	20.7	24.9	-999.9	-999.9	1	1	1	1	1
Laguna del Hunco	eeco	lat	slr	-42.5	-70	-43.09	-56.48	-49.96	-58.96	-999.9	19.3	-999.9	-999.9	17.1	21.5	17.1	21.5	-999.9	-999.9	1	1	1	1	1
Rio Pichileufu	eeco	lat	slr	-42.17	-70	-42.76	-56.5	-49.63	-58.88	-999.9	20.6	-999.9	-999.9	18.5	22.7	18.5	22.7	-999.9	-999.9	1	1	1	1	1
bass river	lp	sst	tex86	39.61	-74.44	42.22	-58.2	35.19	-46.33	23.18	29.94	36.02	1.05	-999.9	-999.9	23.18	36.02	21.18	37.55	1	1	0	1	1
bass river	petm	sst	tex86	39.61	-74.44	42.22	-58.2	35.19	-46.33	30.36	37.92	45.86	1.08	-999.9	-999.9	30.36	45.86	28.45	48.14	1	1	0	1	1
fur	lp	sst	tex86	56.84	8.99	55.99	7.27	45.89	10.01	8.32	15.07	20.73	0.9	-999.9	-999.9	8.32	20.73	7.62	21.34	1	1	0	1	1
fur	petm	sst	tex86	56.84	8.99	55.99	7.27	45.89	10.01	24.72	30.67	38.53	2.14	-999.9	-999.9	24.72	38.53	23.07	41.79	1	1	0	1	1
hampden beach	eeco	sst	tex86	-45.32	170.83	-57.05	-162.78	-48.22	-163.7	27.35	34.46	43.42	2.48	-999.9	-999.9	27.35	43.42	24.58	48.04	1	1	0	1	1
harrell	petm	sst	tex86	32.25	-88.72	36.41	-73.7	31.67	-61.72	30.44	38.09	45.84	1.08	-999.9	-999.9	30.44	45.84	28.04	47.69	1	1	0	1	1
hatchetigbee	eeco	sst	tex86	31.45	-88.05	34.86	-74.27	29.54	-63.73	23.74	30.57	38.35	1.66	-999.9	-999.9	23.74	38.35	20.97	40.61	1	1	0	1	1
ib10a	lp	sst	tex86	6.8	3.63	2.99	-2.16	-7.33	3.59	28.34	35.45	42.94	1.48	-999.9	-999.9	28.34	42.94	25.43	45.04	1	1	0	1	1
ib10A	petm	sst	tex86	6.8	3.63	2.99	-2.16	-7.33	3.59	33.72	41.96	50.97	1.25	-999.9	-999.9	33.72	50.97	32.98	52.04	1	1	0	1	1
ib10b	lp	sst	tex86	6.8	3.63	2.99	-2.16	-7.33	3.59	28.18	35.47	42.5	1.44	-999.9	-999.9	28.18	42.5	24.51	44.77	1	1	0	1	1
ib10B	petm	sst	tex86	6.8	3.63	2.99	-2.16	-7.33	3.59	31.08	38.8	46.61	2.1	-999.9	-999.9	31.08	46.61	27.5	50.22	1	1	0	1	1
iodp 1356	eeco	sst	tex86	-63.31	136	-66.49	129.6	-57.97	144.8	26.36	33.37	40.2	1.25	-999.9	-999.9	26.36	40.2	21.55	42.92	1	1	0	1	1
iodp 302	petm	sst	tex86	87.87	136.18	82.81	66.91	75.91	27.79	17.26	23.77	31.69	1.11	-999.9	-999.9	17.26	31.69	15.28	33.38	1	1	0	1	1
midwaipara	eeco	sst	tex86	-43.06	172.61	-54.88	-160.24	-46.26	-161.19	28.26	34.46	43.47	1.41	-999.9	-999.9	28.26	43.47	25.87	45.45	1	1	0	1	1
midwaipara	petm	sst	tex86	-43.06	172.61	-56.82	-158.25	-47.52	-158.5	30.69	37.16	46.94	1.86	-999.9	-999.9	30.69	46.94	29.55	48.61	1	1	0	1	1
odp 1172	eeco	sst	tex86	-43.58	149.56	-68.31	160.09	-58.38	167.13	25.9	32.76	41.23	1.79	-999.9	-999.9	25.9	41.23	20.23	43.58	1	1	0	1	1
odp 1172	lp	sst	tex86	-43.58	149.56	-69.46	159.91	-59.25	169.56	18.96	25.48	32.15	1.14	-999.9	-999.9	18.96	32.15	16.99	35.1	1	1	0	1	1
odp 1172	petm	sst	tex86	-43.58	149.56	-69.46	159.91	-59.25	169.56	26.69	33.62	42.31	1.37	-999.9	-999.9	26.69	42.31	25.08	45.2	1	1	0	1	1
odp 929	eeco	sst	tex86	5.97	-43.73	6.06	-31.69	-3.43	-26.42	-999.9	37.46	-999.9	-999.9	-999.9	-999.9	-999.9	-999.9	-999.9	-999.9	1	1	0	1	1
odp 959	eeco	sst	tex86	3.63	-2.74	0.66	-8.39	-9.27	-3.12	29.95	37.49	45.54	0.51	-999.9	-999.9	29.95	45.54	29.28	46.65	1	1	0	1	1
odp 959	lp	sst	tex86	3.63	-2.74	0.82	-8.92	-9.55	-3.21	28.83	36.16	43.89	0.75	-999.9	-999.9	28.83	43.89	27.86	45.52	1	1	0	1	1
odp 959	petm	sst	tex86	3.63	-2.74	0.82	-8.92	-9.55	-3.21	34.59	43.15	52.58	0.2	-999.9	-999.9	34.59	52.58	34.27	53.04	1	1	0	1	1
sagamu nigeria	lp	sst	tex86	6.8	3.63	2.99	-2.16	-7.33	3.59	28.83	36.23	43.7	1.05	-999.9	-999.9	28.83	43.7	27.02	45.26	1	1	0	1	1
siberia	eeco	sst	tex86	53.5	73.52	53.6	71.58	51.65	63.91	17.66	23.82	30.87	1.76	-999.9	-999.9	17.66	30.87	14.19	34.8	1	1	0	1	1
siberia	lp	sst	tex86	53.5	73.52	54.11	71.74	51.03	64.45	9.38	16.01	21.98	1.65	-999.9	-999.9	9.38	21.98	7.59	25.99	1	1	0	1	1
siberia	petm	sst	tex86	53.5	73.52	54.11	71.74	51.03	64.45	21.45	27.52	35.49	1.01	-999.9	-999.9	21.45	35.49	20.37	36.61	1	1	0	1	1
south dover bridge	eeco	sst	tex86	38.7	-76.1	40.85	-60.84	33.72	-50.31	26.69	33.79	42.43	0.6	-999.9	-999.9	26.69	42.43	25.96	43	1	1	0	1	1
store baelt	lp	sst	tex86	52.35	11.8	51.55	10.28	41.6	12.9	11.33	17.81	24.13	5.03	-999.9	-999.9	11.33	24.13	5.72	32.92	1	1	0	1	1
store baelt	petm	sst	tex86	52.35	11.8	51.55	10.28	41.6	12.9	20.54	26.64	34.44	2.85	-999.9	-999.9	20.54	34.44	18.54	39.79	1	1	0	1	1
tanzania	eeco	sst	tex86	-8.85	39.63	-16.77	32.65	-23.49	40.56	26.01	33.04	39.79	2.89	-999.9	-999.9	26.01	39.79	24.17	42.23	1	1	0	1	1
wilson lake	eeco	sst	tex86	39.66	-75.04	41.69	-59.59	34.41	-49.03	25.06	31.81	38.54	1.47	-999.9	-999.9	25.06	38.54	23.61	40.16	1	1	0	1	1
wilson lake	lp	sst	tex86	39.66	-75.04	42.23	-58.01	35.17	-46.16	21.37	27.91	33.91	0.85	-999.9	-999.9	21.37	33.91	19.05	35.94	1	1	0	1	1
wilson lake	petm	sst	tex86	39.66	-75.04	42.23	-58.01	35.17	-46.16	31.45	39.13	47.42	1.38	-999.9	-999.9	31.45	47.42	29.45	50.4	1	1	0	1	1
