# Supplementary material for: Global mean surface temperature and climate sensitivity of the early Eocene Climatic Optimum (EECO), Paleocene–Eocene Thermal Maximum (PETM), and latest Paleocene
Source: Copernicus journal article supplement (doi:10.5194/cp-16-1953-2020), 2020-10-26
Supplement: Supplementary file 2 [file cp-16-1953-2020-supplement.zip › Inglis Data 190620.xlsx]

## Sheet: Dsurf1
	GMST (EO3 - hotspot)						GMST (EO4 - hotspot)						GMST CESM1.2 6x hotspot						GMST average of EO3 + EO4
Experiment	EECO	SD	LP	SD	PETM	SD	EECO	SD	LP	SD	PETM	SD	EECO	SD	LP	SD	PETM	SD	EECO	SD	LP	SD	PETM	SD
Dsurf-default	24.5356	0.808945	26.8843	1.29892	33.944	1.42652	24.5893	0.80662	26.3897	1.28757	33.8082	1.39468	25.1507	0.880053	25.025	1.20906	31.84	1.19886	24.5625	0.807783	26.637	1.29324	33.8761	1.4106
Dsurf-Frosty	23.4982	0.763075	24.1607	1.04867	30.2412	1.22561	23.6627	0.763071	23.8304	1.02764	30.2635	1.19184	24.0747	0.832071	23.3249	1.02753	29.0312	1.06772	23.5804	0.763073	23.9956	1.03815	30.2524	1.20873
Dsurf-NoTEX	22.0071	0.826349	25.5764	1.41103	31.9901	1.51354	21.9539	0.822773	25.1487	1.38646	32.0536	1.48004	22.7892	0.911442	23.5567	1.20734	29.5536	1.23615	21.9805	0.824561	25.3625	1.39874	32.0219	1.49679
Dsurf-NoMBT	25.0339	0.894144	27.2661	1.37434	34.4807	1.56108	25.0215	0.897687	26.7742	1.42412	34.3583	1.54029	25.4442	0.994419	25.0755	1.28158	32.1641	1.3239	25.0277	0.895916	27.0202	1.39923	34.4195	1.55069
Dsurf-NoMammal	26.9861	0.73437	26.8843	1.29892	33.944	1.42652	27.3913	0.748625	26.3897	1.28757	33.8082	1.39468	27.5037	0.911558	25.025	1.20906	31.84	1.19886	27.1887	0.741497	26.637	1.29324	33.8761	1.4106
																			GMST estimates in Inglis et al., 2020 (Figure 6-7)
	GMST (EO3 - pmag)						GMST (EO4 - pmag)						GMST CESM1.2 6x pmag
Experiment	EECO	SD	LP	SD	PETM	SD	EECO	SD	LP	SD	PETM	SD	EECO	SD	LP	SD	PETM	SD
Dsurf-default	27.2121	0.933469	24.2298	1.2489	30.7796	1.22056	26.952	0.880811	24.0941	1.29949	30.5504	1.17644	26.2113	0.768156	24.0514	1.41295	30.3711	1.22047

## Sheet: Dsurf2
	a) original sensitivity experiments
		GMST									GMST									GMST									GMST									GMST
	Experiment	HadCM3L									CCSM3									GFDL									CESM1.2									Average of HadCM3L and CCSM3
	Model	EECO	SD	n	LP	SD	n	PETM	SD	n	EECO	SD	n	LP	SD	n	PETM	SD	n	EECO	SD	n	LP	SD	n	PETM	SD	n	EECO	SD	n	LP	SD	n	PETM	SD	n	EECO	SD	n	LP	SD	n	PETM	SD	n
	Dsurf-default	27.5148	8.87717	107	27.5599	8.05182	33	34.4938	13.9523	43	25.8603	8.95502	107	26.1011	5.8115	33	32.2648	6.66422	43	26.2069	8.72554	107	27.3245	6.39355	33	33.1466	6.752	43	25.8156	9.69626	107	27.0524	5.67752	33	32.7	6.58319	43	26.6876	8.91609	107	26.8305	6.93166	33	33.3793	10.3083	43
	Dsurf-Frosty	26.8747	9.18173	114	24.8837	9.39116	43	31.9453	14.2725	52	25.3571	9.10142	114	24.0639	7.24927	43	30.2634	8.18219	52	25.5559	9.13976	114	24.5375	8.72343	43	30.718	8.99329	52	25.1243	10.0051	114	23.8257	8.79157	43	30.239	8.95875	52	26.1159	9.14157	114	24.4738	8.32021	43	31.1044	11.2273	52
	Dsurf-NoTEX	26.1591	7.42332	96	25.9831	6.54403	23	29.2227	5.98233	31	24.8374	8.41966	96	25.7924	6.60156	23	30.3851	6.02693	31	25.2469	8.41381	96	27.0149	7.2707	23	31.3588	6.59111	31	24.6614	9.21109	96	26.4714	6.3328	23	30.5513	5.69871	31	25.4982	7.92149	96	25.8878	6.5728	23	29.8039	6.00463	31
	Dsurf-NoMBT	28.4957	8.68712	88	27.6749	8.22361	29	35.2218	14.5779	38	27.0882	8.90982	88	26.3388	5.87938	29	32.7659	6.81252	38	27.5399	8.3976	88	27.0497	6.61988	29	33.3178	7.10057	38	27.2404	9.05071	88	27.0758	5.93185	29	33.0271	6.87538	38	27.7919	8.79847	88	27.0069	7.0515	29	33.9939	10.6952	38
	Dsurf-NoMammal	28.2197	8.8468	97	27.5599	8.05182	33	34.4938	13.9523	43	25.8574	8.93113	97	26.1011	5.8115	33	32.2648	6.66422	43	26.2791	8.5758	97	27.3245	6.39355	33	33.1466	6.752	43	25.9824	9.56916	97	27.0524	5.67752	33	32.7	6.58319	43	27.0386	8.88896	97	26.8305	6.93166	33	33.3793	10.3083	43
																																						GMST estimates in Inglis et al., 2020 (Figure 6-7)
		GMST									GMST									GMST									GMST
		HadCM3L									CCSM3									GFDL									CESM1.2
	Experiment	EECO	SD	n	LP	SD	n	PETM	SD	n	EECO	SD	n	LP	SD	n	PETM	SD	n	EECO	SD	n	LP	SD	n	PETM	SD	n	EECO	SD	n	LP	SD	n	PETM	SD	n
	Dsurf-default-SST	33.2689	10.2433	27	27.7666	8.80254	23	38.2667	16.34	26	32.4621	8.81652	27	25.3182	5.16332	23	31.957	7.17011	26	24.3457	8.45781	80	30.4337	6.67067	10	34.0814	6.084	17	23.5929	9.1725	80	29.148	5.42431	10	32.7384	4.86383	17
	Dsurf-default-LAT	25.5728	7.488	80	27.0846	6.38323	10	28.7236	5.94205	17	23.6322	7.88004	80	27.9018	7.05308	10	32.7355	5.98855	17	31.7217	7.12746	27	25.9726	5.91184	23	32.5354	7.2054	26	32.4014	8.21093	27	26.1413	5.65558	23	32.6749	7.59384	26
	c) additional sensitivity experiment to explore mantle vs magnetic reference frame
		GMST									GMST									GMST									GMST
	Experiment	HadCM3L									CCSM3									GFDL									CESM1.2
	Model	EECO	SD	n	LP	SD	n	PETM	SD	n	EECO	SD	n	LP	SD	n	PETM	SD	n	EECO	SD	n	LP	SD	n	PETM	SD	n	EECO	SD	n	LP	SD	n	PETM	SD	n
	Dsurf-default-pmag	26.2874	6.67559	107	24.098	6.64075	33	30.6804	8.84817	43	26.6174	7.32375	107	24.3133	6.0951	33	28.3889	7.1269	43	26.4654	6.21915	107	23.7734	5.90726	33	29.336	6.47157	43	26.4298	6.19158	107	23.9663	5.96275	33	28.7495	6.80504	43
	mantle - pmag	1.2274	2.20158	0	3.4619	1.41107	0	3.8134	5.10413	0	-0.7571	1.63127	0	1.7878	-0.2836	0	3.8759	-0.46268	0	-0.2585	2.50639	0	3.5511	0.48629	0	3.8106	0.28043	0	-0.6142	3.50468	0	3.0861	-0.28523	0	3.9505	-0.22185	0
	d) additional sensitivity experiment to GMST-SST scaling
		GMST
		CESM1.2
	Experiment	EECO	SD	n	LP	SD	n	PETM	SD	n
	Dsurf-default (3x, 6x)	25.8156	9.69626	107	27.0524	5.67752	33	32.7	6.58319	43
	Dsurf-default (3x, 9x))	26.226	8.90132	107	27.0928	5.86758	33	32.7949	6.53661	43

## Sheet: Dsurf3
GMST (anomaly to PI)
Experiment	EECO	SD	LP	SD	PETM	SD
Model	Guassian Regression Model
DeepMIP-all	8.36276	7.75285	7.1792	6.0034	11.1203	10.5108
DeepMIP-all-NoFrosty	11.369	7.16742	10.1901	5.82805	14.4882	9.49077
DeepMIP-all-NoTEX	6.68398	6.80955	6.052	5.97441	7.59239	9.2716
DeepMIP-all-NoMBT	8.5647	7.60586	7.22905	4.96512	8.21489	12.5412
DeepMIP-all-NoMammal	8.80427	7.93046	7.1792	6.0034	11.1203	10.5108
DeepMIP-all-NoSWPacific	5.23479	6.73811	5.13459	5.37622	7.11704	11.4833
GMST							GMST
Experiment	LP	SD	PETM	SD	EECO	SD	Experiment	LP	SD	PETM	SD	EECO	SD
Model	Gaussian - paleomagnetic ref. frame						Model	Gaussian - mantle ref. frame
Dsurf-default	26.5	1.3	30.3	1.2	28.2	1.3	Dsurf-default	27.6	1.5	32.6	1.5	29.8	1.5
Dsurf-Frosty	24.1	1.2	28.4	1.3	25.9	1.3	Dsurf-Frosty	25.2	1.4	30.2	1.7	27	1.4
Dsurf-NoTEX	25.9	1.5	27.2	1.1	26.5	1.3	Dsurf-NoTEX	25.8	1.3	29.4	1.2	28.7	1.5
Dsurf-NoMBT	26.5	1.2	30.6	1.7	28.3	1.3	Dsurf-NoMBT	27.6	1.5	32.7	2	29.9	1.5
Dsurf-NoMammal	26.5	1.3	30.3	1.2	28.6	1.3	Dsurf-NoMammal	27.6	1.5	32.6	1.6	30.2	1.5
								GMST estimates in Inglis et al., 2020 (Figure 6-7)

## Sheet: Dsurf4
		Mantle reference frame
		GMST (SST + LAT)						GMST (SST)						GMST (LAT)
	Experiment	EECO	SD	LP	SD	PETM	SD	EECO	SD	LP	SD	PETM	SD	EECO	SD	LP	SD	PETM	SD
	Dsurf-default	25.7289	1.065	26.7939	1.3109	30.6588	1.6061	29.2679	1.3332	27.1926	1.367	32.8841	1.6499	23.3501	1.6192	24.5727	2.8384	27.2352	2.7462
	Dsurf-Frosty	25.1042	0.99298	24.89	1.0843	28.7892	1.3704	27.1531	1.2961	24.5339	1.145	29.4124	1.5578	23.3181	1.6423	24.5489	2.8198	27.3224	2.7788
	Dsurf-NoTEX	24.4094	1.2033	25.9018	1.4732	27.24	1.48	26.4284	1.2664	26.7095	1.6423	28.8534	2.0375	23.3393	1.6267	24.5598	2.9131	27.2998	2.786
	Dsurf-NoMBT	26.7137	1.1557	27.0489	1.4726	31.4018	1.7191	29.294	1.3386	27.1902	1.3758	32.8699	1.6458	24.9789	2.0631	26.796	5.7092	32.041	133.411
	Dsurf-NoMammal	25.6843	1.0511	26.8079	1.2946	30.6561	1.6112	29.2577	1.3412	27.1921	1.3593	32.9022	1.6543	22.5786	1.7008	24.6181	2.9147	27.2704	2.7773
		GMST estimates in Inglis et al., 2020 (Figure 6-7)
		Paleomagnetic reference frame
		GMST (SST + LAT)						GMST (SST)						GMST (LAT)
	Experiment	EECO	SD	LP	SD	PETM	SD	EECO	SD	LP	SD	PETM	SD	EECO	SD	LP	SD	PETM	SD
	Dsurf-default	25.725	1.0569	26.771	1.2931	30.6052	1.5784	29.2898	1.3159	27.1899	1.3819	32.9178	1.6666	23.338	1.6319	24.6101	2.8948	27.3245	2.7311
	Dsurf-Frosty	25.1082	0.98822	24.8677	1.0733	28.7969	1.4005	27.1565	1.3109	24.5399	1.1578	29.4161	1.567	23.3725	1.6076	24.564	2.8334	27.3335	2.6798
	Dsurf-NoTEX	24.4518	1.1909	25.8919	1.47	27.2336	1.4695	26.4653	1.2488	26.7153	1.6543	28.8631	2.0658	23.322	1.6064	24.581	2.8989	27.2918	2.7999
	Dsurf-NoMBT	26.7423	1.1497	27.0291	1.4682	31.4045	1.7016	29.3029	1.3111	27.1775	1.3818	32.8783	1.671	24.9492	2.0766	26.8631	5.5416	32.1095	135.609
	Dsurf-NoMammal	25.6871	1.0625	26.8161	1.3071	30.6736	1.5684	29.3013	1.3433	27.1807	1.4155	32.9031	1.646	22.6159	1.7344	24.5951	2.8656	27.2911	2.7797

## Sheet: Ddeep1
		GMST
	Experiment	EECO	1 SD	LP	1 SD	PETM	1 SD
	Ddeep-1	28	1.3	25.8	1.4	31.1	2.9
		GMST estimates in Inglis et al., 2020 (Figure 6-7)

## Sheet: Dcomb1
		GMST
	Experiment	EECO	1 SD	LP	1 SD	PETM	1 SD
	Dcomb-1	22.8	1	21.6	1.2	26.6	2.1
		GMST estimates in Inglis et al., 2020 (Figure 6-7)

## Sheet: GMST (each "best" estimate)
	Individual GMST estimates (Figure 6 in Inglis 2020)
	Method	Ref. Frame	EECO	1 SD	LP	1 SD	PETM	1 SD	Experiment
	Dsurf 1	Mantle	27.19	0.74	26.64	1.29	33.88	1.41	v1 (except EECO which uses v5)
	Dsurf 2	Mantle	26.69	8.92	26.83	6.93	33.38	10.31	v1
	Dsurf 3	Mantle	29.8	1.5	27.6	1.5	32.6	1.5	v1
	Dsurf 4	Mantle	25.73	1.07	26.79	1.31	30.66	1.61	v1
	Ddeep 1	n/a	28	1.3	25.8	1.4	31.1	2.9	n/a
	Dcomb 1	Mantle	22.8	1	21.6	1.2	26.6	2.1	n/a

## Sheet: GMST (combined "best" estimate)
		Combined GMST estimates (Figure 7 in Inglis 2020)
			Confidence intervals (%)									Standard deviation
		Timeslice	0.05	0.1	0.166	0.333	0.5	0.666	0.833	0.9	0.95	2SD (-) (0.0227501)	1SD (-) (0.158655)	1SD (+) (0.841345)	2SD (+) (0.977250)
		LP	20.2395	21.2592	22.3345	25.1429	26.2532	27.1527	28.2947	29.1218	30.8329	18.8612	22.2076	28.3746	34.4427
		PETM	24.0317	25.7223	27.2143	29.8853	31.5762	32.9582	34.5343	35.6417	38.9147	21.6247	27.0648	34.639	44.6996
		EECO	21.0174	22.2489	23.1638	25.6832	26.9536	27.9692	29.6733	30.7671	32.4261	16.9144	23.0641	29.7876	36.4482

## Sheet: CO2
	CO2 estimates
		Confidence intervals
	Interval	Lower error (2SD)	Mean	Upper error (2SD)	Reference
	EECO	760	1625	760	Anagnostou et al., 2016; Hollis et al., 2019
	LP	400	870	400	Gutjahr et al., 2017.
	PETM	699	2200	1904	Gutjahr et al, 2017

## Sheet: ECS
	S[CO2+LI+VG+AE] values
		Confidence intervals (%)
	Timeslice	0.05	0.1	0.166	0.333	0.5	0.666	0.833	0.9	0.95
	LP	0.226849	0.402033	0.60751	0.945646	1.15958	1.38374	1.75351	2.05253	2.51811
	PETM	0.362625	0.485466	0.5975	0.783724	0.91633	1.03444	1.20061	1.33445	1.57495
	EECO	0.198301	0.3415	0.455245	0.66289	0.803663	0.941484	1.1464	1.30119	1.5642
	"Bulk" ECS (Figure 8 in Inglis 2020)
		Confidence intervals (%)
	Timeslice	0.05	0.1	0.166	0.333	0.5	0.666	0.833	0.9	0.95
	LP	0.879039	1.55788	2.3541	3.66438	4.49337	5.36199	6.79485	7.95355	9.75768
	PETM	1.40517	1.88118	2.31531	3.03693	3.55078	4.00845	4.65236	5.17099	6.10293
	EECO	0.768417	1.32331	1.76407	2.5687	3.11419	3.64825	4.44229	5.0421	6.06126
