# Supplementary material for: Global mean surface temperature and climate sensitivity of the early Eocene Climatic Optimum (EECO), Paleocene–Eocene Thermal Maximum (PETM), and latest Paleocene
Source: Copernicus journal article supplement (doi:10.5194/cp-16-1953-2020), 2020-10-26
Supplement: Supplementary file 2 [file cp-16-1953-2020-supplement.zip › Read Me Hollis 2019 DeepMIP Compilation.xlsx]

## Sheet: ReadMe1
column	type	definition
site	string	site
timeslice	string	PETM, LP or EECO
temperature	float	SST or LAT measurements
proxy	string	proxy type
lat	float	modern latitude
lon	float	modern longitude
mlat	float	mantle latitude at 56 Ma (for PETM/LP) or 52 Ma (for EECO)
mlon	float	mantle longitude at 56 Ma (for PETM/LP) or 52 Ma (for EECO)
plat	float	paleomag latitude at 56 Ma (for PETM/LP) or 52 Ma (for EECO)
plon	float	paleomag longitude at 56 Ma (for PETM/LP) or 52 Ma (for EECO)
5	float	5% percentile of temperature estimates for EECO, PETM or LP time-slice (where possible, full 90% uncertainty reported. Otherwise, time-series uncertainty shown).
50	float	50% percentile of temperature estimates for EECO, PETM or LP time-slice (where possible, full 90% uncertainty reported. Otherwise, time-series uncertainty shown).
95	float	95% percentile of temperature estimates for EECO, PETM or LP time-slice (where possible, full 90% uncertainty reported. Otherwise, time-series uncertainty shown).
sd	float	standard deviation for 50% percentile of temperature values for EECO, PETM or LP time-slice
mean minus reported error	float	mean value minus the "reported error"
mean plus reported error	float	mean value plus the "reported error"
deepmip lower error	float	error to be used in deepMIP calculations
deepmip upper error	float	error to be used in deepMIP calculations
min	float	minimum tempreature estimate for EECO, PETM or LP time-slice sample ensembles
max	float	maximum tempreature estimate for EECO, PETM or LP time-slice sample ensembles
v1	bool	DeepMIP-all without recrystallized planktonic foraminifera δ18O values
v2	bool	All SST and LAT data compiled in Hollis et al. (2019) (i.e. DeepMIP-all)
v3	bool	DeepMIP-all without frosty forams and TEX86 values
v4	bool	DeepMIP-all without frosty forams and MBT(‘)/CBT values from marine sediments
v5	bool	DeepMIP-all without frosty forams mammal and paleosol δ18O values

## Sheet: ReadMe2
proxy abbreviation	proxy description
tex86	TEX86
mgca	Mg/Ca
del18O	Oxygen isotopes
del47	Clumped Isotopes
ca	Coexistence Approach
ba	Bioclimatic Analysis
cam	Climatic Amplitude Method
lma	Leaf Margin Analysis
clamp	Climate Leaf Analysis Multivariate Program
mbtcbt	MBT/CBT
mlr	Multiple Linear Regression
slr	Single Linear Regression (e.g. LMA)
cca	Canonical Correspondence Analysis
all	angiosperm leaf length
pls	podocarp leaf size
gdgtlignite	GDGT lignite proxy

## Sheet: ReadMe3
When calculating "error bars", I recommend using columns Q and R in your analysis. These are derived using a variety of approaches, detailed below.
tex86	full 90% uncertainty (Hollis et al., 2019)
mgca	full 90% uncertainty (Hollis et al., 2019)
del47	reported error from Evans et al. (2018) and as reported in deepMIP compilation
del18O	90% uncertainty of 50 percentile values for time-slice sample ensembles (Hollis et al., 2019)
ca	mean value plus/minus the reported error (error may be methdological and/or temporal error) (Hollis et al., 2019)
ba	mean value plus/minus the reported error (error may be methdological and/or temporal error) (Hollis et al., 2019)
cam	mean value plus/minus the reported error (error may be methdological and/or temporal error) (Hollis et al., 2019)
lma	mean value plus/minus the reported error (error may be methdological and/or temporal error) (Hollis et al., 2019)
clamp	mean value plus/minus the reported error (error may be methdological and/or temporal error) (Hollis et al., 2019)
mbtcbt	mean value plus/minus the reported error (error may be methdological and/or temporal error) (Hollis et al., 2019)
mlr	mean value plus/minus the reported error (error may be methdological and/or temporal error) (Hollis et al., 2019)
slr	mean value plus/minus the reported error (error may be methdological and/or temporal error) (Hollis et al., 2019)
cca	mean value plus/minus the reported error (error may be methdological and/or temporal error) (Hollis et al., 2019)
all	mean value plus/minus the reported error (error may be methdological and/or temporal error) (Hollis et al., 2019)
pls	mean value plus/minus the reported error (error may be methdological and/or temporal error) (Hollis et al., 2019)
gdgtlignite	mean value plus/minus the reported error (error may be methdological and/or temporal error) (Hollis et al., 2019)
